# Supplementary material for: Interventions for the Current COVID-19 Pandemic: Frontline Workers' Intention to Use Personal Protective Equipment
Source: PubMed Central journal article supplement (PMC8855926; doi:10.3389/fpubh.2021.793642), 2022-02-04
Supplement: Table_1.pdf [file Table_1.pdf]

**Appendix A: Survey questionnaire.**

---

**Part 1: Demographic attributes of FLWs**

---

|                       |             |                   |                 |                 |            |
|-----------------------|-------------|-------------------|-----------------|-----------------|------------|
| <b>Gender</b>         | Male        | Female            |                 |                 |            |
| <b>Age</b>            | 18-30       | 31-40             | 41-50           | Above 50        |            |
| <b>Income (PKR)</b>   | > 25,00     | 26,000-35,000     | 36,000-45,000   | 46,000-55,000   | < 50,000   |
| <b>Education</b>      | High school | Bachelor's degree | Master's degree | Doctoral degree |            |
| <b>Experience</b>     | > 5 years   | 6-10 years        | 11-15 years     | 16-20 years     | < 20 years |
| <b>Marital status</b> | Married     | Unmarried         | Divorced        |                 |            |

---

**Part 2: FLWs' influencing factors affecting intention to use PPE**

---

| <b>Constructs</b>                   | <b>Statements</b>                                                                  | <b>1</b> | <b>2</b> | <b>3</b> | <b>4</b> | <b>5</b> |
|-------------------------------------|------------------------------------------------------------------------------------|----------|----------|----------|----------|----------|
| <b><u>Attitude</u></b>              |                                                                                    |          |          |          |          |          |
| <b>ATD1</b>                         | I have a favorable attitude about using PPE                                        |          |          |          |          |          |
| <b>ATD2</b>                         | I have a favorable attitude that using PPE would save me from getting an infection |          |          |          |          |          |
| <b>ATD3</b>                         | When I meet with individuals, I use PPE                                            |          |          |          |          |          |
| <b>ATD4</b>                         | It is recommended to use PPE when stepping out                                     |          |          |          |          |          |
| <b>ATD5</b>                         | I believe that everyone should use PPE in public settings                          |          |          |          |          |          |
| <b>ATD6</b>                         | I feel that using PPE during an epidemic is advantageous to society                |          |          |          |          |          |
| <b>ATD7</b>                         | I believe that using PPE benefits society in a positive way                        |          |          |          |          |          |
| <b><u>Environmental concern</u></b> |                                                                                    |          |          |          |          |          |

---

- 
- ECO1** I am concerned about the pandemic's environmental ramifications
- ECO2** I am concerned about the spread of pandemic among my country's FLWs
- ECO3** I am worried about the spreading of the COVID-19 outbreak in my country
- ECO4** Climate change concerns me as a result of COVID-19's repercussions

**Cost of PPE**

- CPPE1** The cost of PPE is very high
- CPPE2** Cost is a major factor when it comes to purchasing PPE
- CPPE3** I am unable to purchase PPE because I lack sufficient money
- CPPE4** I am unable to frequently purchase PPE
- CPPE5** I think that buying PPE have an extra burden on my expenditures

**Risk perceptions of the pandemic**

- RPP1** COVID-19 is a serious outbreak
- RPP2** FLWs who do not use PPE are prone to infection
- RPP3** It is dangerous to venture out without using PPE
- RPP4** I am more secure at public meetings after using PPE
- RPP5** It is prudent to take preventative steps during the pandemic

**Perceived benefits of PPE**

- BPPE1** PPE usage is an excellent preventive strategy
-

- 
- BPPE2** PPE usage safeguards health
- BPPE3** PPE usage lowers the likelihood of contracting an infection
- BPPE4** PPE usage minimizes the likelihood of inhaling unclean air
- BPPE5** PPE usage will help me avoid exposure to the new SARS-CoV-2 virus
- BPPE6** I have no qualms about venturing out after using PPE
- BPPE7** PPE usage protect people against viral infections

**Unavailability of PPE**

- UPPE1** There is unavailability of PPE in the country
- UPPE2** In my opinion, the country lacks a sufficient stock of PPE
- UPPE3** I am having problems acquiring PPE
- UPPE4** The unavailability of PPE demotivates me to use PPE
- UPPE5** I am unable to use PPE because of a lack of availability of PPE

**Intention to use PPE**

- ITU1** The outbreak encourages me to use PPE
- ITU2** I intend to increase my expenditure on PPE
- ITU3** I strongly recommend others to use PPE
- ITU4** In general, I intend to use PPE
-
